# The *brinker* gradient controls wing growth in *Drosophila*

Francisco A. Martín, Ainhoa Pérez-Garijo, Eduardo Moreno\* and Ginés Morata†

Centro de Biología Molecular CSIC-UAM, Universidad Autónoma de Madrid, Madrid 28049, Spain

\*Present address: Institut für Molecularbiologie, Universität Zurich, Winterthurerstrasse 190, 8057 Zürich, Switzerland

†Author for correspondence (e-mail: gmorata@cblm.uam.es)

Accepted 29 July 2004

Development 131, 4921-4930

Published by The Company of Biologists 2004

doi:10.1242/dev.01385

## Summary

The Decapentaplegic (Dpp) morphogen gradient controls growth and patterning in the *Drosophila* appendages. There is recent evidence indicating that the Dpp gradient is converted into an inverse gradient of activity of the gene *brinker* (*brk*), which encodes a transcriptional repressor and is negatively regulated by the Dpp pathway. We have studied how alterations in the Brk gradient affect the growth of the wing disc. We find that there is a negative correlation between *brk* activity and growth of the disc: high levels of *brk* prevent or reduce growth, whereas loss of *brk* activity results in excessive growth. This effect is

concentration dependent: different amounts of Brk produce distinct rates of growth. Furthermore, our results demonstrate that although *brk* is able to induce apoptosis where there is a sharp difference in Brk levels, its role as a growth repressor is not achieved by inducing apoptosis but by reducing cell proliferation. Brk appears to downregulate the activity of genes that control cell proliferation, such as *bantam*.

Key words: Dpp pathway, Brinker, Growth control, Wing disc, *Drosophila*

## Introduction

Different species of animals show large variations in size, even within the same systematic group. For example, the size of Dipteran flies may range between a 1.5 mm long *Drosophila* and a 25 mm long *Volucella*. Given the general conservation of major biological processes, the overall mechanism controlling size is likely to be conserved, at least for closely related species, e.g. *Drosophila* and *Volucella*. Yet the final size may be very different, indicating that the same mechanism may produce very different outcomes.

In normal circumstances, the different parts of an organism grow in a coherent manner: each organ reaches a size related to the overall size. When, after experimental (e.g. malnutrition) or genetic [mutations defective in the Insulin pathway; reviewed by Stocker and Hafen (Stocker and Hafen, 2000)] manipulations, the overall body size of *Drosophila* is altered, all organs are correspondingly modified, indicating the existence of a general mechanism that controls growth.

Superimposed with this overall mechanism there have to be other local processes controlling growth in individual organs and tissues. For example, the imaginal discs of *Drosophila* grow by active cell division during most of the larval period and stop growing at the beginning of pupation (García-Bellido and Merriam, 1971a). By contrast, the abdominal histoblasts do not divide during the larval period and start rapid proliferation at the beginning of pupation (García-Bellido and Merriam, 1971b; Madhavan and Madhavan, 1984). These two organs use different modes of growth.

The imaginal discs of *Drosophila* provide a convenient model with which to study growth and size control. The wing disc begins cell proliferation at the first larval instar when it contains ~30-50 cells (Lawrence and Morata, 1977; Morata and Garcia-Bellido, 1976) and reaches the final size at the onset

of pupation, with about 50,000 cells. The proliferation rate appears to be uniform in the different regions of the disc, and is about 9 hours per division cycle (Garcia-Bellido and Merriam, 1971a; Johnston and Sanders, 2003).

The wing disc contains endogenous factors that promote, as well as others arrest, growth (Bryant and Simpson, 1984). For example, a young disc will continue growing when cultured in vivo but will not grow beyond the size corresponding to the mature disc, even if it is maintained in in vivo culture for several additional days (Bryant, 1975; Kirby et al., 1982). This is in contrast to the behaviour of dissociated disc cells or disc fragments under similar culture conditions, which can grow indefinitely and often transdetermine (Gehring, 1976). This indicates the existence of some internal mechanism, presumably related with the dimensions and the physical integrity of the disc, that stops growth at the appropriate developmental stage.

The Dpp signalling pathway is a key factor involved in establishing pattern and growth in the wing disc (Podos and Ferguson, 1999; Strigini and Cohen, 1999). The *dpp* gene is expressed in a narrow stripe close to the AP compartment boundary, but the Dpp protein diffuses in anterior and posterior directions forming a concentration gradient (Entchev et al., 2000; Lecuit et al., 1996; Nellen et al., 1996; Teلمان and Cohen, 2000; Zecca et al., 1995). Through a well-characterised transduction pathway (reviewed by Raftery and Sutherland, 1999; Tabata, 2001), the Dpp signal activates different target genes according to its local concentration. The local values of Dpp therefore reflect a measure of the distance relative to the AP border, thus providing a positional cue. Various Dpp targets already identified, such as *spalt* (*sal*), *optomotor blind* (*omb*), *vestigial* (*vg*), are positively regulated by Dpp and appear to be involved in the patterning of specific regions of the wing (de Celis et al., 1996; Grimm and

Pflugfelder, 1996; Kim et al., 1996; Lecuit et al., 1996; Podos and Ferguson, 1999; Sturtevant et al., 1997). One particular target is the transcriptional repressor *brinker* (*brk*), which is negatively regulated by Dpp, but, where active, is able to block the expression of Dpp target genes (Campbell and Tomlinson, 1999; Jazwinska et al., 1999; Minami et al., 1999); *brk* behaves as a general antagonist of the Dpp pathway. Recent evidence indicates that the Dpp gradient is converted into an inverse gradient of *brk* (Muller et al., 2003). As the Dpp targets can be activated in absence of Dpp activity (Marty et al., 2000), it can be argued that it is the local levels of *brk* that determine the pattern and growth of the disc. In this report, we refer to the Dpp/Brk gradient as a single biological function, assuming that the intracellular concentrations of Dpp are converted in the nuclei of the cells into the corresponding levels of the transcriptional repressor Brk.

One of the functions of Dpp is to stimulate growth: cells deficient for the activity of the Dpp receptor *thick veins* (*tkv*) do not proliferate, even when they are located away from the Dpp source (Burke and Basler, 1996), indicating that it stimulates growth at a distance. Conversely, cells with unrestricted activity of the Tkv receptor proliferate in excess (Martín-Castellanos and Edgar, 2002). Other additional evidence for the growth-promoting role of Dpp comes from experiments in which Dpp activity is forced outside its normal domain (Burke and Basler, 1996; Capdevila and Guerrero, 1994; Haerry et al., 1998; Zecca et al., 1995). The usual outcome is the appearance of outgrowths associated with local duplications.

As Dpp functions may be mediated by *brk*, it follows that the latter has a role in growth control. Indeed, there is evidence that alterations in *brk* activity affect growth: *brk* mutant discs are bigger than wild type (Campbell and Tomlinson, 1999), and clones of *brk*<sup>-</sup> cells produce local outgrowths (Campbell and Tomlinson, 1999; Jazwinska et al., 1999; Minami et al., 1999). In addition, recent work (Moreno et al., 2002) has shown that in certain circumstances *brk* is able to trigger programmed cell death (apoptosis) to eliminate slow dividing cells, a property that may play a role in regulating growth.

Recent reports (Brennecke et al., 2003; Harvey et al., 2003; Hipfner et al., 2002; Jia et al., 2003; Kango-Singh et al., 2002; Pantalacci et al., 2003; Tapon et al., 2002; Udan et al., 2003; Wu et al., 2003) have identified several genes involved in the control of cell proliferation, notably *bantam*, *hippo* (*hpo*), *salvador* (*sav*) and *warts* (*wts*). *bantam* encodes a 21 nucleotide microRNA that promotes cell division and prevents apoptosis (Hipfner et al., 2002; Brennecke et al., 2003). Genes encoding miRNAs are supposed to be post-transcriptional regulators, interfering with the function of their target genes by a mechanism similar to RNA-mediated interference (Ruvkun, 2001). Thus, *bantam* would be expected to suppress target genes that repress cell proliferation and promote apoptosis. Indeed, Brennecke et al. (Brennecke et al., 2003) have shown that *bantam* suppresses the pro-apoptotic gene *hid*.

In this report, we study the role of the Dpp pathway and *brk* in the growth of the wing disc. We show that the growth-promoting activity of the Dpp pathway is achieved by repression of *brk*, which functions as a growth repressor in a concentration-dependent manner. We also show that although *brk* is able to induce apoptosis, its role in preventing growth in the wing disc is not mediated by massive apoptosis, but by arresting cell proliferation. We present evidence that *brk* downregulates *bantam*

## Materials and methods

### Fly strains

The following *Drosophila* lines were used to generate loss-of-function clones: *y w brk<sup>M68</sup> f<sup>36</sup> FRT18A/FM6* (Jazwinska et al., 1999), *w arm-LacZ FRT18A/FM6; hsFlp/CyO*, *y w ubi-GFP FRT18A; hsFlp/TM6B* (Bloomington Stock center), *y w hsGFP hsFlp FRT18* (Moreno et al., 2002). Clones were induced by larval heat shock carried out at 37°C for 30 minutes at 48-72 hours after egg laying.

For gain-of-function experiments, the GAL4 lines used were: *nub-Gal4*, *C765-Gal4*, *en-Gal4*, *ap-Gal4*, *omb-Gal4* (Calleja et al., 1996) (M. Calleja and G.M., unpublished) and *hh-Gal4* (a gift from T. Tabata). The UAS lines were: *UAS-GFP* (Bloomington Stock Center), *UAS-dpp<sup>D</sup>*, *UAS-dpp<sup>G</sup>*; *UAS-dpp<sup>D</sup>* (Capdevila and Guerrero, 1994), *UAS-tkv<sup>2D</sup>* (Nellen et al., 1996), *UAS-tkv<sup>DN</sup>* (Haerry et al., 1998), *UAS-dad* (Tsuneizumi et al., 1997), *UAS-brk* (Jazwinska et al., 1999), *UAS-p35* (Bloomington Stock center) and *UAS-puc2A* (Martín-Blanco et al., 1998). Other strains were *puc<sup>E69</sup>* (Martín-Blanco et al., 1998), *bantam* sensor (Brennecke et al., 2003) and the B40 transgene (Muller et al., 2003) that reproduced *brk* expression faithfully. To induce *brk*<sup>-</sup> clones in territories where Dpp pathway is inactivated, larvae of *y w brk<sup>M68</sup> f<sup>36</sup> FRT18A/y w hs-GFP hsFlp FRT18A; nub-Gal4/UAS-dad* were heat shocked at 37°C for 15 minutes at 48-72 hours after egg-laying.

### Histochemistry

Fixation and immunohistochemistry of imaginal discs were carried out as described (Aldaz et al., 2003). The following antibodies and dilutions were used: rabbit anti-cleaved caspase 3, 1:50 (Cell Signalling Technology); mouse anti-*wg*, 1:50 (Hybridoma Center); rabbit anti-β-Gal, 1:2000 (Cappel); and rabbit anti-Phospho-Histone H3, 1:400 (Cell Signalling Technology). Secondary Antibodies used were purchased from Jackson Immunoresearch.

The TdT-mediated dUTP nick end-labelling (TUNEL) assay was performed following the in situ cell death detection kit as described (Wang et al., 1999). BrdU staining was carried out as described (Udan et al., 2003).

Images were taken in confocal microscopes MicroRadiance (BioRad) or LSM510 META (Zeiss), and subsequently processed using Zeiss LSM Image Browser or MetaMorph and Adobe Photoshop.

### Preparation of adult cuticles

The adult flies were dissected in water and cut into pieces. They were then treated with 10% KOH at 95°C for 3-5 minutes to digest internal tissues, washed with water, rinsed in ethanol and mounted in Euparal. The preparations were studied and photographed using a Zeiss photomicroscope.

### Bantam sequence analysis

By using the Target Explorer tool (Sosinsky et al., 2003), we generated a weight matrix with a set of sequences that have been shown to interact physically and functionally with Brk protein (Barrio and de Celis, 2004; Rushlow et al., 2001; Saller et al., 2002; Sivasankaran et al., 2000). We searched for these binding sites in a 20 kb fragment of DNA containing the *bantam* sequence and found two possible sites (GCAGCGCCAC and TCAGCGCCAC), 700 bp and 500 bp upstream *bantam*.

## Results

### Wing size correlates with the activity of the Dpp gradient

Previous work has demonstrated that the activity of the Dpp pathway is necessary for normal growth; *dpp* mutants lacking the adult function possess very small discs, and cells unable to

transduce the Dpp signal fail to proliferate (Burke and Basler, 1996). Moreover, overexpression of the Dpp pathway produces excessive growth in some wing regions (Capdevila and Guerrero, 1994; Martín-Castellanos and Edgar, 2002).

We have tested in detail how the growth of the wing disc is affected by modifications of the Dpp pathway. We have used the Gal4/UAS method (Brand and Perrimon, 1993) to alter the active levels of the pathway and have examined their effects on the size of the disc or of the adult wing. Some constructs allow modification of the amount or the distribution of the Dpp signal (*UAS-dpp*), whereas others permit the interference with Dpp transduction: *UAS-tkv<sup>QD</sup>*, *UAS-tkv<sup>DN</sup>* and *UAS-dad*. *Tkv<sup>QD</sup>* is a modified form of the Tkv receptor that causes a constitutive activity of the pathway (Nellen et al., 1996), whereas *Tkv<sup>DN</sup>* is a dominant-negative form that causes a reduction of activity (Haerry et al., 1998). *daughters against dpp* (*dad*) is a negative modulator of the pathway; it encodes a Smad protein that interferes with the phosphorylation of the Mad protein, a Dpp transducer, and with its interaction with the co-factor Medea (Inoue et al., 1998; Tsuneizumi et al., 1997). Raising *dad* levels produces a debilitation or inactivation of the Dpp pathway (Inoue et al., 1998; Muller et al., 2003; Tsuneizumi et al., 1997).

We have used Gal4 lines that permit the discrimination of the major regions of the wing. The *nub-Gal4* and *C765* lines drive expression uniformly in the wing region, so we can examine the response of all wing cells to alterations of ligand concentration or of other components of the pathway. One advantage of the use of these lines is that, as alterations are mostly restricted to the wing blade, nearly all the combinations are viable or produce pharate adults, so that the effects can be examined in differentiated wings and in imaginal discs.

The general result is that the size of the wing correlates with the activity of the Dpp pathway. Some of the results are shown in Fig. 1. The increase of Dpp signal in *nub-Gal4>UAS-dpp*

(Fig. 1A,B) results in discs in which the wing pouch is bigger than the wild type (Fig. 1C), whereas the inhibition of Dpp activity in *nub-Gal4>UAS-dad* produces a very small wing pouch (Fig. 1D). The comparison of Fig. 1A,B is of interest because the only difference between the two discs is the amount of Dpp signal; their difference in size illustrates clearly the dependence of growth on the levels of Dpp activity. The effect observed in the discs can also be visualised in adult wings. In the series of genotypes shown in Fig. 1F-I, the gradual decrease in the size of the adult wing correlates with the levels of activity of the Dpp pathway.

A significant finding is that in the cases in which the wing pouch becomes bigger than the wild type (Fig. 1A,B), the additional growth appears to be due to excessive cell proliferation in the lateral region of the disc: while the incorporation of BrdU in the wild-type disc is homogenous (not shown), in all the discs examined ( $n=11$ ) of genotype *nub-Gal4>UAS-dpp* BrdU incorporation is much more intense in the lateral region, although we still observe incorporation in the central region (Fig. 1E). The zone of increased proliferation coincides approximately with the *brk* domain and suggests that the size increase corresponds mostly or entirely to expansion of the *brk* domain.

The previous result suggests that the Dpp pathway affects wing size by regulating *brk* activity, and is coherent with the fact that it represses *brk* expression (Campbell and Tomlinson, 1999; Jazwinska et al., 1999; Minami et al., 1999). Then it would be expected that there should be a negative correlation between wing size and *brk* levels. This is indeed the case, as illustrated in Fig. 2. This observation suggests that *brk* functions as a growth repressor and that the excessive growth observed in genotypes with high levels of Dpp activity (Fig. 1A,B,F; Fig. 2A,B) is due to suppression of *brk* in the wing pouch.

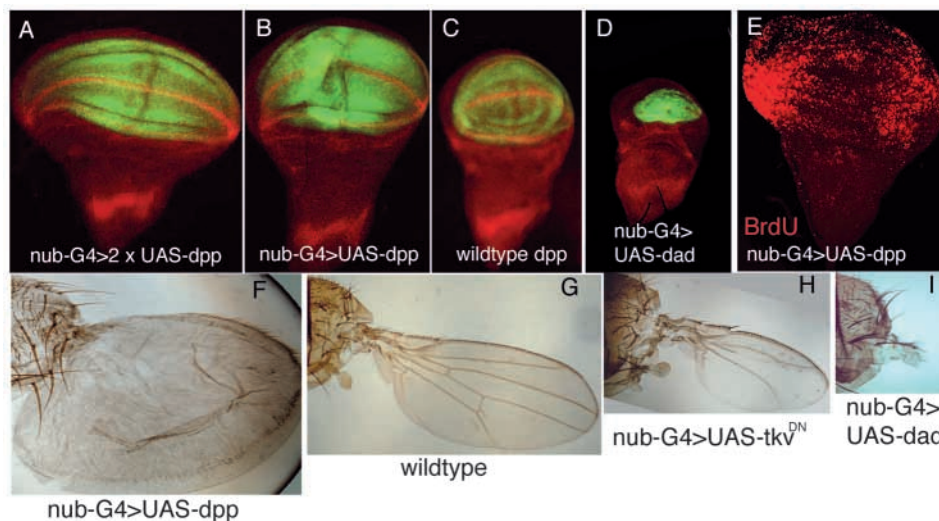

**Fig. 1.** Wing size correlates with Dpp activity. (A-D) Wing discs containing different levels of Dpp activity in the wing pouch. All the discs are doubly stained for *wg* and GFP. All discs are presented at the same magnification, as indicated by the band of *wg* expression (red) in the thoracic region, which is not modified in the genotypes used. The wing pouch is labelled green using the *UAS-GFP* construct, which is not shown in the figure for simplification, with the *nub-Gal4* driver. (A) The amount of Dpp signal is twice that in B, and results in a larger disc. (C) *nub-Gal4>UAS-GFP* disc contains a normal amount of Dpp. (D) The elevated levels of *dad* antagonise Dpp activity and produce a very small wing pouch. (E) Wing disc of the same genotype as in B, showing BrdU incorporation concentrated in the lateral region. (F-I) Adult wing size is dependent on the activity levels of the Dpp pathway: the greater the activity, the larger the wing.



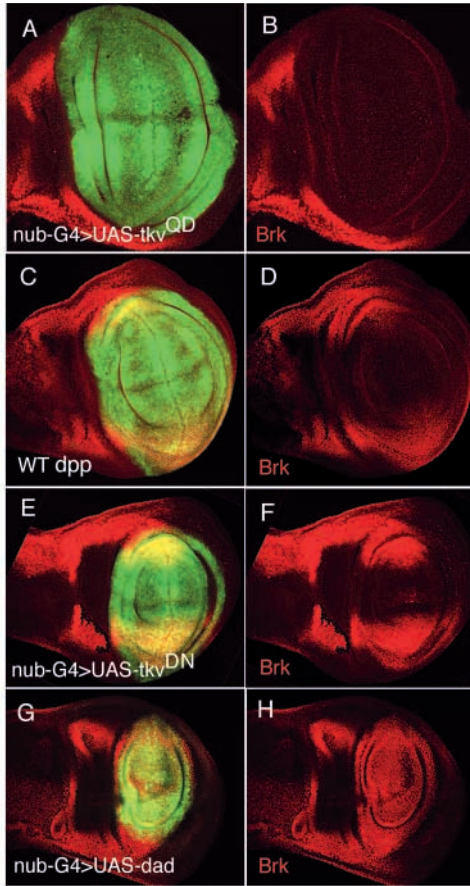

**Fig. 2.** Wing size correlates negatively with *brk* expression. All the discs are doubly stained for GFP and *brk* (anti- $\beta$ gal). The right panels show *brk* expression in red. For simplification, the labels present only a partial notation of the genotype (see Materials and methods). (A,B) A *nub-Gal4>UAS-tkv<sup>QD</sup> UAS-GFP* disc with a large wing pouch that has little or no *brk* activity. (C,D) *nub-Gal4>UAS-GFP* of normal size and normal *brk* activity. (E,F) The reduction of Dpp pathway activity in *nub-Gal4>UAS-tkv<sup>DN</sup> UAS-GFP* results in a small wing pouch associated with high *brk* levels. (G,H) Further diminution of Dpp pathway activity in *nub-Gal4>UAS-dad UAS-GFP* produces a smaller wing pouch associated with an expansion of *brk* expression that covers the whole of the wing pouch.

### Brk as a growth repressor

We have examined directly the role of *brk* on growth by altering its normal function, either eliminating or inducing high levels of *brk* activity. There is evidence that mutant *brk* discs grow in excess (Campbell and Tomlinson, 1999) and that clones of *brk* mutant cells produce outgrowths (Campbell and Tomlinson, 1999; Jazwinska et al., 1999; Minami et al., 1999). We have generated a large number of *brk*<sup>-</sup> clones and compared their size with control clones. A typical feature of these clones is that they produce outgrowths (Fig. 3A,B), which can be observed both in discs and in differentiated wings. They develop independently from surrounding wild-type cells; many form vesicles that sort out from the rest of the disc, while others develop outgrowths that recreate the wing pattern. Unlike the clones of cells expressing *dpp* ectopically (Zecca et al., 1995), *brk*<sup>-</sup> clones do not produce mirror-image duplications, as

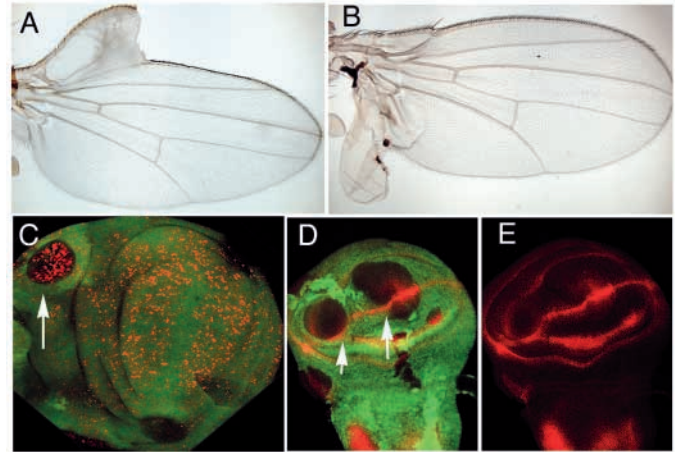

**Fig. 3.** Extra growth produced by *brk* mutant clones. (A,B) *brk*<sup>-</sup> clones (A, yellow; B, *forked*<sup>36</sup>) in the anterior (A) and posterior (B) compartments. The clones do not produce pattern duplications but do produce additional tissue. (C) A disc doubly labelled *arm-lacZ* (green) and BrdU (red) with a *brk*<sup>-</sup> clone (arrow) showing greater BrdU incorporation than surrounding cells. (D,E) Disc of genotype *nub-Gal4>UAS-dad* stained for *wg* (red) containing two *brk*<sup>-</sup> clones (arrows) marked by the loss of GFP (green). The two clones appear in the wing pouch (which is delineated by the internal *wg* ring in E) and overgrow, even though they have originated in the wing pouch where there is virtually no Dpp activity.

caused by the formation of ectopic sources of the Dpp signal (Zecca et al., 1995). The best description of *brk* mutant clones is simply that they grow more than surrounding *brk*<sup>+</sup> cells and therefore tend to make more pattern elements. The clones producing outgrowths are restricted to the lateral region of the disc, the normal *brk* expression domain, whereas those in the central region are of normal size. In accordance with this, *brk*<sup>-</sup> clones in the lateral region incorporate more BrdU than does the surrounding zone: in a sample of nine discs containing 19 *brk*<sup>-</sup> clones, 15 are more densely labelled than surrounding cells (Fig. 3C). These observations indicate that the repressor role of *brk* is restricted to the lateral region of the disc; the central region is regulated independently (see Discussion).

We have also examined whether the loss of *brk* activity can induce additional growth in the absence (or low levels) of Dpp pathway activity. Thus, we induced *brk*<sup>-</sup> clones in discs of genotype *nub-Gal4>UAS-dad* in which the high levels of *dad* impede normal transduction of the Dpp signal (Tsuneizumi et al., 1997). As shown in Fig. 1D,I there is very little growth in the wing pouch of such discs (Fig. 2H). The significant result (illustrated in Fig. 3D) is that *brk*<sup>-</sup> clones are able to overgrow in the wing pouch. We examined 13 discs of this genotype, that contained 26 *brk*<sup>-</sup> clones, all of which showed overgrowth in comparison with control clones. In seven cases in which we could unambiguously identify a *brk*<sup>-</sup> clone and its twin, the average size of the former was 5.36 times bigger. This result emphasises the role of *brk* as a growth repressor and also indicates that Dpp activity *per se* does not promote growth (see Discussion).

The role of *brk* on growth can also be demonstrated in misexpression experiments. We have forced *brk* activity in

various regions of the disc using the Gal4 lines described above. In the combinations *C765-Gal4>UAS-brk* or *nub-Gal4>UAS-brk*, there is *brk* expression in the whole of the wing blade. In all these combinations, it can be observed that the size of the wing is greatly reduced (Fig. 4). The degree of the diminution correlates with the amount of Brk, as illustrated in Fig. 4 for the combination *C765-Gal4>UAS-brk*. At 17°C, the activity of the Gal4 protein is lower than at 25°C or 29°C (Brand and Perrimon, 1993), and this is reflected in the amount of Brk protein synthesised. We observe a clear difference of size both in differentiated wings (Fig. 4A,B) and in discs (Fig. 4C-E) grown at different temperatures. This result is significant, for it indicates that the Brk protein represses growth in a concentration-dependent manner.

The repressing role of *brk* is also demonstrated by the fact that it can suppress the growth of *nub-Gal4>UAS-tkv<sup>OD</sup>* (Fig. 5) wings; flies of genotype *nub-Gal4>UAS-tkv<sup>OD</sup> UAS-brk* develop vestigial wings that are indistinguishable from those of *nub-Gal4>UAS-brk*. Again, the implication is that the excessive growth induced by the constitutive function of Dpp is mediated by inactivation of *brk*. In fact, no *brk* activity is detected in the wing pouch of *nub-Gal4>UAS-tkv<sup>OD</sup>* discs (Fig. 2A).

#### Mode of action of *brk*: apoptosis or growth retardation?

The preceding results demonstrate that Brk protein can block growth, but are not informative about its mode of action. Brk may act through two different mechanisms. The first is that it triggers apoptosis, which may result in reduced growth. In principle, this possibility does not appear likely because there is little apoptosis in normal development of wing discs, even in lateral regions where *brk* is active (Milan et al., 1997; Wolff

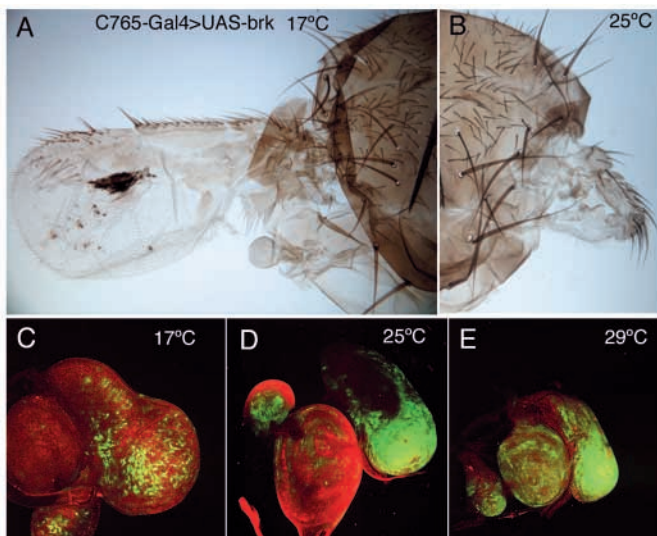

**Fig. 4.** Brk represses growth in a concentration-dependent manner. (A,B) Adult wings and thoraces of the same genotype *C765-Gal4>UAS-brk* grown at 17°C (A) and 25°C (B). The greater activity of Gal4 at 25°C (B) produces more Brk protein, which results in less growth than at 17°C (A). (C-E) Sets of mature *C765-Gal4>UAS-brk UAS-GFP* wing, haltere and leg discs dissected from larvae grown at 17°C (C), 25°C (D) and 29°C (E). The size of the discs inversely correlates with temperature.

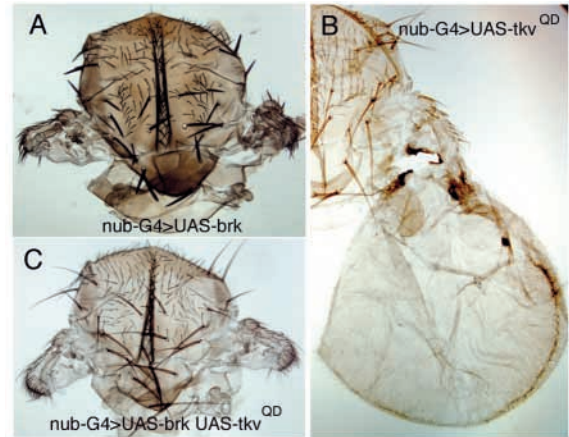

**Fig. 5.** Brk suppresses the excessive growth caused by the constitutive activity of the Dpp receptor TkV in wings. (A) *brk* activity in the wing blocks growth, whereas constitutive activity of the Dpp pathway in the wing cells (B) causes excessive growth. (C) The presence of Brk in the wing suppresses the effect of TkV<sup>OD</sup>.

and Ready, 1991). However, a certain amount of apoptosis may have passed unnoticed, especially because it has only been looked at in mature discs. Moreover, recent experiments (Adachi-Yamada et al., 1999; Adachi-Yamada and O'Connor, 2002; Moreno et al., 2002) have shown that upregulation of *brk* or disruptions in Dpp signalling induce JNK-mediated apoptosis. The other possible mechanism is that Brk represses growth by reducing cell proliferation. We have tested these two possibilities.

We first checked the occurrence of apoptosis in cases in which elevated levels of *brk* cause a large reduction in wing size. In normal wing discs, the levels of apoptosis markers such as TUNEL and the cleaved (active) form of caspase 3 is variable, but low and scattered. In the wing pouch of mature *nub-Gal4>UAS-brk* wing discs, we find a slight increase of caspase 3 (Fig. 6A,B) and TUNEL (Fig. 6C,D), but most of *brk*-expressing cells fail to show these markers.

The previous experiments suggested that apoptosis is not a major factor in the growth repression caused by Brk. However, as these experiments were carried out in mature discs, there was the possibility that Brk may have induced apoptosis in earlier phases of development. If this were the case, it would be expected that apoptosis inhibitors should rescue partially or totally the effect of Brk. We used the baculovirus protein P35 (Hay et al., 1994) to prevent the death of cells that contain high levels of Brk. As shown in Fig. 6E,F the presence of the P35 protein in *nub-Gal4>UAS-brk UAS-p35* discs suppresses the basal apoptosis in the wing pouch. The comparison of *nub-Gal4>UAS-brk* and *omb-Gal4>UAS-brk* flies with their sibs *nub-Gal4>UAS-brk UAS-p35* and *omb-Gal4>UAS-brk UAS-p35*, respectively, reveals that P35 does not rescue the effect of Brk (not shown). To strengthen this observation, we performed additional experiments generating flies of similar genotypes but containing two doses of *UAS-p35*. The extra dose of P35 did not modify the phenotype.

The results of the previous experiments were intriguing, because there is evidence that alterations in *brk* levels cause JNK-mediated apoptosis (Adachi-Yamada and O'Connor,



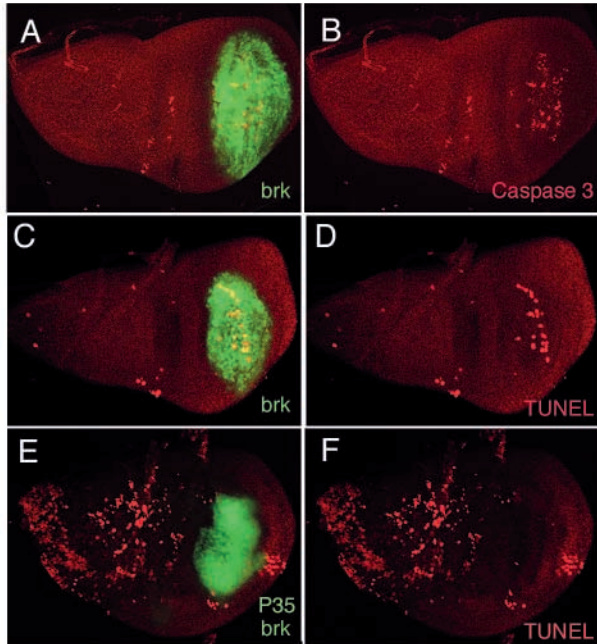

**Fig. 6.** Brk induces low levels of apoptosis in the wing disc. (A) A wing disc of genotype *nub-Gal4>UAS-brk UAS-GFP* doubly stained for GFP (green) and caspase 3 activity (red). The green fluorescence marks where *brk* is expressed. (B) Low level of caspase 3 activity (red) in *brk*-expressing cells. (C,D) A disc of the same genotype but stained for GFP and TUNEL. Only a minority of *brk*-expressing cells undergo apoptosis (red in D). (E,F) Wing disc of genotype *nub-Gal4>UAS-brk UAS-p35 UAS-GFP* stained for GFP and TUNEL (red). The green fluorescence marks the cell containing *brk* and *p35* activity. This disc (F) shows unusually high apoptotic levels, but was chosen to illustrate the effectiveness of *p35* in suppressing cell death (absence of red staining in area corresponding to green staining in E).

2002; Moreno et al., 2002). The former authors have proposed that this form of apoptosis occurs when there is a disruption in the normal Dpp signalling gradient (and hence of the Brk gradient). This apoptosis aims to eliminate cells with disparate Dpp activity levels in order to restore the normal smooth gradient. The implication is that *brk* induces JNK activity only where there is a discontinuity of expression. We tested this by inducing *brk* activity with the *hh-Gal4*, *en-Gal4* and *ap-Gal4* drivers, and have monitored JNK activity with the *puc-lacZ* insertion (Martín-Blanco et al., 1998). These experiments generate a sharp discontinuity of *brk* at the AP (*hh-Gal4>UAS-brk*, *en-Gal4>UAS-brk*) or the DV (*ap-Gal4>UAS-brk*) borders. Some of the results are illustrated in Fig. 7: in *hh-Gal4>UAS-brk puc-lacZ* there is a line of *puc* activity close to the AP border. Similarly, in *ap-Gal4>UAS-brk puc-lacZ* there is *puc* activity close to the DV boundary, as previously described by Adachi-Yamada and O'Connor (Adachi-Yamada and O'Connor, 2002). The activation of *puc* in these cases appears to be non-autonomous, as it affects cells that do not possess *brk* activity (Fig. 7C,D).

In another set of experiments, we examined *puc* expression in discs containing *brk*<sup>-</sup> clones. These clones generate a discontinuity in their borders as they confront cells containing high and null levels of *brk* activity. The clones in the *brk* domain (*n*=27) are associated with a complete (20 cases) or

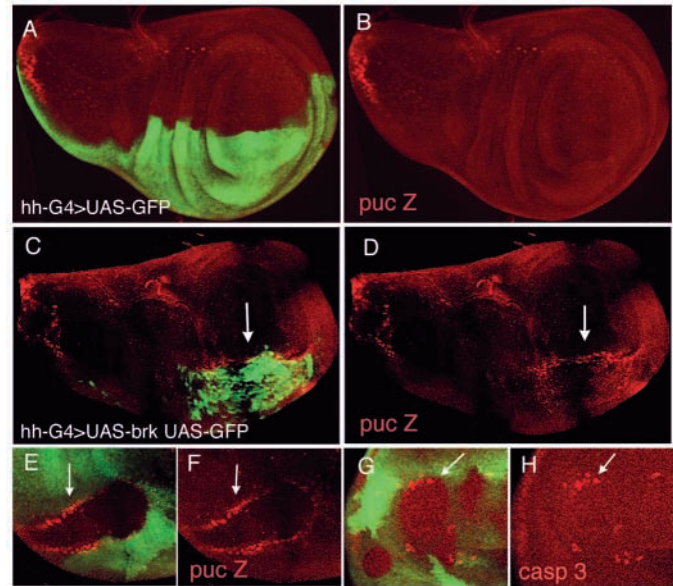

**Fig. 7.** Discontinuous levels of Brk give rise to JNK-mediated apoptosis. The activity of the JNK pathway is monitored by the expression of the *puc-lacZ* insert. (A,B) Control *hh-Gal4>UAS-GFP* disc showing normal JNK activity, which is restricted to the proximal thoracic region. *pucZ* expression is shown in red. (C,D) Disc of *hh-Gal4>UAS-brk UAS-GFP*. There is *puc* expression (red) at the border of the *brk*-expressing cells (green), along the AP compartment boundary (arrows). There appears to be *puc* expression at both sides of the border, suggesting a non-autonomous effect. (E,F) Clone of *brk*<sup>-</sup> cells labelled by the loss of GFP (green) showing *puc* activity at the border (arrows). (G,H) Caspase 3 activity (red, arrows) in the border of a *brk*<sup>-</sup> clone (shown by loss of green staining). There are also some scattered caspase-positive cells in the vicinity of other *brk*<sup>-</sup> clones.

incomplete ring of JNK activation in the border, which affects cells outside the clones as well as inside (Fig. 7E,F). In some cases (16 out of a sample of 40) there is also caspase 3 activity in cells in the borders (Fig. 7G,H). The variations of *brk* levels in this experiment are, unlike the high levels often obtained using the Gal4/UAS method, within the physiological range of *brk* activity. Thus, the induction of JNK-mediated apoptosis does not depend on absolute *brk* levels, but on the formation of a sharp interface.

We tested the possibility that the JNK-mediated apoptosis described above may contribute to the reduction in wing size. Overexpression of *puc* has been shown to downregulate the activity of the JNK pathway (Martín-Blanco et al., 1998), and also to reduce apoptosis of cells containing high *brk* levels (Moreno et al., 2002). We therefore constructed flies of genotypes *nub-Gal4>UAS-brk UAS-puc* and *omb-Gal4>UAS-brk UAS-puc*, and compared them with *nub-Gal4>UAS-brk* and *omb-Gal4>UAS-brk*. We failed to observe any difference in wing size.

### Brk inhibits cell division and downregulates *bantam*

All the preceding results suggest that the growth inhibition induced by *brk* is not mediated by massive apoptosis, but more likely by reducing the rate of cell proliferation. We have checked the division rate of cells containing high levels of *brk*

using two different markers of cell division: the incorporation of BrdU and the staining with an antibody that recognises the phosphorylated form of Histone 3 (Su et al., 1998). In wild-type discs, the levels of BrdU and PH3 staining are uniform over the disc. In *nub-Gal4>UAS-brk* discs ( $n=10$ ), both proliferation markers are less expressed in the wing pouch in comparison with other regions of the disc (Fig. 8). Similar results are obtained with *hh-Gal4>UAS-brk* discs ( $n=27$ ) in which *brk* is expressed at high levels in the posterior compartment (Fig. 8). These results strongly suggest that the principal function of *brk* is to reduce the rate of cell proliferation.

We tried to identify genes involved in cell proliferation as possible targets of Brk. A candidate is the gene *bantam*, which encodes a small RNA and has been shown to promote proliferation and to prevent apoptosis (Brennecke et al., 2003). To monitor *bantam* expression, we have used the *bantam* sensor developed by Brennecke et al. (Brennecke et al., 2003). The expression of the sensor can be taken as the negative of the levels of proliferation in the wing disc. We have examined *bantam* expression in clones of *brk* mutant cells, as well as in

genetic combinations with altered *brk* activity. In *nub-Gal4>UAS-*tkv*<sup>QD</sup>* discs, the levels of the sensor are reduced in the lateral region of the disc (Fig. 9A-D), indicating a raise of *bantam* expression, in correspondence with the increased proliferation levels observed in this zone. Similarly, *brk*<sup>-</sup> clones show a diminution of sensor level (Fig. 9E,F), also indicating a raise in *bantam* expression. These experiments clearly indicate that *bantam* is downregulated by *brk*, although the regulation may not be direct. However, using a collection of published DNA sequences containing Brk-binding sites we constructed a matrix (see Materials and methods) to identify potential sites in the vicinity of the *bantam* gene. We have found two sites in a 20 kb fragment that includes *bantam*, suggesting the possibility of direct regulation by Brk.

## Discussion

Our experiments deal with the roles of the Dpp signalling pathway and *brk* in the control of growth of the *Drosophila* wing disc. As the Dpp gradient is transformed into a

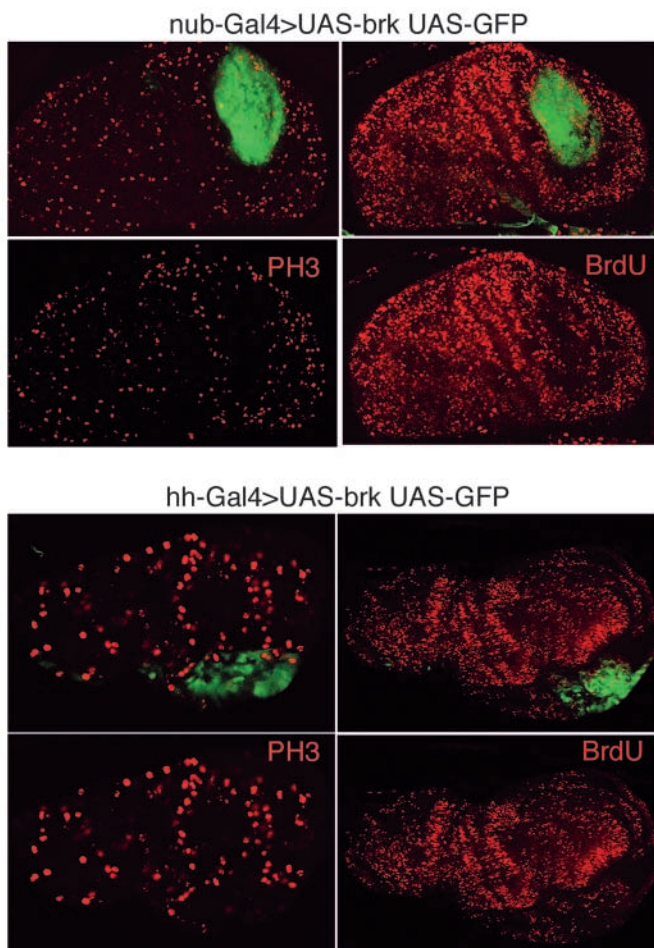

**Fig. 8.** Brk reduces the rates of cell proliferation. The upper panels show two discs of genotype *nub-Gal4>UAS-brk UAS-GFP* doubly stained for GFP and PH3 (left) and GFP and BrdU (right). In both cases, there is a marked reduction of both PH3 or BrdU (red) in the cells expressing *brk*. In the lower panels, two discs of genotype *hh-Gal4>UAS-brk UAS-GFP* show a similar result.

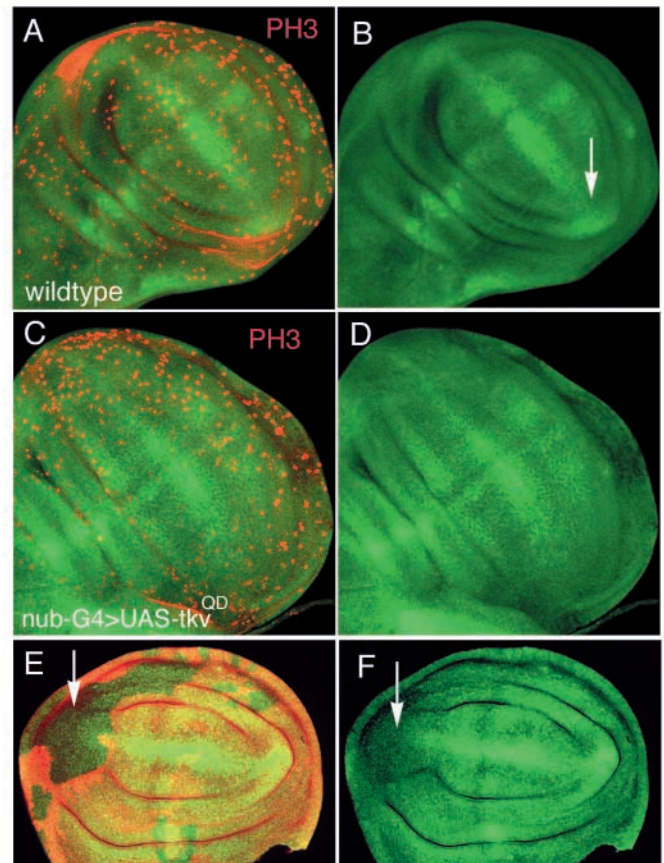

**Fig. 9.** Brk downregulates *bantam*. (A,B) Wing disc with normal *brk* activity stained for PH3 and the *bantam* sensor: the brighter green colour corresponds to low *bantam* expression (see main text). The arrow indicates a characteristic zone of low *bantam* levels located in the *brk* domain. The distribution of the PH3 dots in the disc is uniform, indicating the uniform cell proliferation levels in the disc. (C,D) Disc of *nub-Gal4>UAS-*tkv*<sup>QD</sup>* genotype showing more PH3 staining in the lateral region, which is associated with partial loss of *bantam*. (E,F) A *brk*<sup>-</sup> clone showing greater *bantam* activity (arrows), as indicated by the reduction in the level of green staining.



complementary Brk gradient (Muller et al., 2003), the issue of how the Brk gradient regulates wing growth can be addressed. We will first discuss some aspects of its mode of action and then we will deal with its overall function in growth control.

### Two different functions of *brk*

We find that alterations of *brk* expression may have two different consequences.

#### Activation of the JNK pathway

This occurs when an alteration of *brk* expression generates a sharp border of *brk* activity. We have observed this phenomenon both in experiments inducing ectopic *brk* activity and in others in which *brk* function is eliminated in clones of cells (see Fig. 7). The local induction of JNK results in apoptosis that can be visualised by the activation of caspase 3 (Fig. 7G,H).

This local apoptosis induced by Brk is probably the mechanism of cell elimination during cell competition (Morata and Ripoll, 1975; Moreno et al., 2002) and suggests that *brk* is involved in the elimination of slow dividing cells or of cells that are not able to read or interpret efficiently the Dpp pathway. This function may be aimed to keep the general fitness of the cell population (Moreno et al., 2002). However, it does not appear to be involved in growth control, because apoptosis inhibition (by means of *puc* or *p35* overexpression) does not eliminate the effect on size caused by Brk.

#### Alterations of cell proliferation rate

Previous work has already shown that loss of *brk* activity results in increased growth: in mutant *brk* discs there is an enlargement of the lateral region (Campbell and Tomlinson, 1999), and cells mutant for *brk* produce outgrowths (Campbell and Tomlinson, 1999; Jazwinska et al., 1999; Minami et al., 1999) (this work). We show that the cause for the additional growth associated with the loss or reduction of *brk* activity is due to an increase in the cell proliferation rate: *brk*<sup>-</sup> clones incorporate BrdU more actively than surrounding cells (Fig. 3C). Conversely, the repression of growth caused by elevated levels of Brk is associated with reduced mitotic activity and BrdU incorporation (Fig. 8).

Given the nature of the Brk protein, it would be expected that its role in growth be mediated by transcriptional repression of genes involved in cell division and proliferation. Our results indicate that it acts as a repressor of *bantam* (Fig. 9), although this control may not be direct. Given that Bantam protein is itself a post-transcriptional regulator of cell division genes (Brennecke et al., 2003), this observation suggests that Brk occupies a high position in the genetic hierarchy controlling cell proliferation. Its activity links Dpp signalling and cell proliferation.

### Control of growth by the Brk gradient

Our results, and those of others (Burke and Basler, 1996; Martín-Castellanos and Edgar, 2002), have established that the Dpp pathway is involved in the control of growth of the wing (and of other appendages; data not shown). The activity of the Dpp pathway has a positive effect on growth, and, furthermore, we find that the growth response of the disc correlates with its levels of activity. This graded response is of interest, as it suggests that growth control mechanisms recognise different

concentrations of inducing or repressing factors. This result has implications in the understanding of these mechanisms; classically, it has been argued that proliferation in the imaginal discs is a response to confrontation of cells with different positional values (French et al., 1976; Haynie and Bryant, 1976). Our results in the wing disc do not support this view, as they suggest that growth is a lineal response to Dpp/Brk activity.

Our results also indicate that the role of Dpp on growth is mediated by *brk*. The simplest view is that as the Dpp gradient is converted into an inverse Brk gradient, the concentration-dependent stimulus of Dpp on growth should be converted into a concentration-dependent repression by Brk. Our demonstration (Fig. 4) that the effect of Brk on wing size depends on the amount of protein supports this view.

There are several arguments that implicate *brk* as a principal factor controlling growth. First, loss of *brk* activity leads to increased proliferation (Fig. 3A-C). This is consistent with previous observations (Campbell and Tomlinson, 1999) showing that *brk* wing discs are bigger than wild-type discs. Furthermore, this excessive proliferation can occur in absence of Dpp activity. Fig. 3D shows two overgrowing *brk* mutant clones originated from the wing pouch of *nub-Gal4>UAS-dad* discs in which Dpp function is obliterated or much reduced. Second, increased or ectopic *brk* levels block or reduce growth, even though *brk* does not alter *dpp* expression (Fig. 4A-E). And, third, the stimulation caused by the Dpp pathway on growth requires repression of *brk*. This is demonstrated by our finding that the presence of Brk protein suppresses the excessive growth caused by Dpp hyperactivity (Fig. 5).

Together, these observations indicate that growth does not require direct input from Dpp, but simply its repression of *brk*. However, the repression of *brk* by Dpp is an important developmental phenomenon because in the absence of such control *brk* would become constitutively active, thus repressing all or the majority of Dpp targets. Recent work (Muller et al., 2003) has identified two control elements in the *brk* regulatory region: a Dpp-regulated silencer that contains binding sites for the Mad/Medea complex; and a constitutive enhancer. This enhancer is probably responsible of the generalised *brk* expression in the absence of Dpp activity.

What is the role of *brk* in normal development? Our results demonstrate that Brk has the properties of a growth repressor and can perform this function all over the wing. However, in wild-type wing discs, *brk* is expressed only in the lateral region and therefore its repressing role is limited to this region. This is agreement with the observation that *brk*<sup>-</sup> clones overgrow only on the sides of the disc (Campbell and Tomlinson, 1999; Jazwinska et al., 1999; Minami et al., 1999) (this work).

The restriction of the role of *brk* to the lateral region is intriguing, because if it were the only repressor it would be expected that the central region, where there is no *brk* activity, would grow more than the lateral one. The overall growth of the different wing regions is uniform; not only does clone size fail to change in the different wing regions (García-Bellido and Merriam, 1971a) but BrdU incorporation and PH3 staining are also uniform (Milan et al., 1996; Johnston and Sanders, 2003). This suggests that there another factor located in the centre of the disc should exist that represses growth in the absence of *brk*. This hypothetical gene would fulfil in the centre of the wing the role that *brk* performs in the lateral region.



In principle, a candidate could be *daughters against dpp* (*dad*), a Dpp target that is expressed at high levels in the centre of the disc. We have observed that *dad* overexpression reduces growth. However, this appears to be achieved by allowing high *brk* levels (Fig. 2G,H) subsequent to slackening of Dpp activity (Tsuneizumi et al., 1997), indicating that the effect of *dad* is mediated by *brk*. Thus, *dad* appears to be a Dpp modulator with no direct role in growth. Our finding that *brk* clones containing high levels of *dad* can overgrow (Fig. 3D) also supports this view.

We thank Ernesto Sanchez-Herrero and José Felix de Celis for comments on the manuscript, Luis F. de Navas for help with the crosses, Rosa Gonzalez and Angélica Cantarero for technical help, and T. Tabata and S. Cohen for sending fly stocks. F.A.M. is supported by a fellowship of the Comunidad Autónoma de Madrid. This work was supported by grants from the Ministry of Science and Technology.

## References

- Adachi-Yamada, T. and O'Connor, M. B.** (2002). Morphogenetic apoptosis: a mechanism for correcting discontinuities in morphogen gradients. *Dev. Biol.* **251**, 74-90.
- Adachi-Yamada, T., Fujimura-Kamada, K., Nishida, Y. and Matsumoto, K.** (1999). Distorsion of proximodistal information causes JNK-dependent apoptosis in *Drosophila* wing. *Nature* **400**, 166-169.
- Aldaz, S., Morata, G. and Azpiazu, N.** (2003). The Pax-homeobox gene eyegone is involved in the subdivision of the thorax of *Drosophila*. *Development* **130**, 4473-4482.
- Barrio, R. and de Celis, J. F.** (2004). Regulation of spalt expression in the *Drosophila* wing blade in response to the Decapentaplegic signaling pathway. *Proc. Natl. Acad. Sci. USA* **101**, 6021-6026.
- Brand, A. H. and Perrimon, N.** (1993). Targeted gene expression as a means of altering cell fates and generating dominant phenotypes. *Development* **118**, 401-415.
- Brennecke, J., Hipfner, D. R., Stark, A., Russell, R. B. and Cohen, S. M.** (2003). bantam encodes a developmentally regulated microRNA that controls cell proliferation and regulates the proapoptotic gene *hid* in *Drosophila*. *Cell* **113**, 25-36.
- Bryant, P.** (1975). Pattern formation in the imaginal wing disc of *Drosophila melanogaster*: fate map, regeneration and duplication. *J. Exp. Zool.* **193**, 49-78.
- Bryant, P. J. and Simpson, P.** (1984). Intrinsic and extrinsic control of growth in developing organs. *Q. Rev. Biol.* **59**, 387-415.
- Burke, R. and Basler, K.** (1996). Dpp receptors are autonomously required for cell proliferation in the entire developing *Drosophila* wing. *Development* **122**, 2261-2269.
- Calleja, M., Moreno, E., Pelaz, S. and Morata, G.** (1996). Visualization of gene expression in living adult *Drosophila*. *Science* **274**, 252-255.
- Campbell, G. and Tomlinson, A.** (1999). Transducing the Dpp morphogen gradient in the wing of *Drosophila*: regulation of Dpp targets by brinker. *Cell* **96**, 553-562.
- Capdevila, J. and Guerrero, I.** (1994). Targeted expression of the signaling molecule decapentaplegic induces pattern duplications and growth alterations in *Drosophila* wings. *EMBO J.* **13**, 4459-4468.
- de Celis, J. F., Barrio, R. and Kafatos, F. C.** (1996). A gene complex acting downstream of dpp in *Drosophila* wing morphogenesis. *Nature* **381**, 421-424.
- Entchev, E. V., Schwabedissen, A. and Gonzalez-Gaitan, M.** (2000). Gradient formation of the TGF-beta homolog Dpp. *Cell* **103**, 981-991.
- French, V., Bryant, P. J. and Bryant, S. V.** (1976). Pattern regulation in epimorphic fields. *Science* **193**, 969-981.
- García-Bellido, A. and Merriam, J.** (1971a). Parameters of the wing imaginal disc development of *Drosophila melanogaster*. *Dev. Biol.* **24**, 61-87.
- García-Bellido, A. and Merriam, J. R.** (1971b). Clonal parameters of tergite development in *Drosophila*. *Dev. Biol.* **26**, 264-276.
- Gehring, W.** (1976). Developmental genetics of *Drosophila*. *Ann. Rev. Genet.* **10**, 209-252.
- Grimm, S. and Pflugfelder, G. O.** (1996). Control of the gene *optomotor-blind* in *Drosophila* wing development by dacapentaplegic and wingless. *Science* **271**, 1601-1604.
- Haerry, T. E., Khalsa, O., O'Connor, M. B. and Wharton, K. A.** (1998). Synergistic signaling by two BMP ligands through the SAX and TKV receptors controls wing growth and patterning in *Drosophila*. *Development* **125**, 3977-3987.
- Harvey, K. F., Pfeleger, C. M. and Hariharan, I. K.** (2003). The *Drosophila* Mst ortholog, hippo, restricts growth and cell proliferation and promotes apoptosis. *Cell* **114**, 457-467.
- Hay, B. A., Wolff, T. and Rubin, G. M.** (1994). Expression of baculovirus P35 prevents cell death in *Drosophila*. *Development* **120**, 2121-2129.
- Haynie, J. L. and Bryant, P. J.** (1976). Intercalary regeneration in imaginal wing disk of *Drosophila melanogaster*. *Nature* **259**, 659-662.
- Hipfner, D. R., Weigmann, K. and Cohen, S. M.** (2002). The bantam gene regulates *Drosophila* growth. *Genetics* **161**, 1527-1537.
- Inoue, H., Imamura, T., Ishidou, Y., Takase, M., Udagawa, Y., Oka, Y., Tsuneizumi, K., Tabata, T., Miyazono, K. and Kawabata, M.** (1998). Interplay of signal mediators of decapentaplegic (Dpp): molecular characterization of mothers against dpp, Medea, and daughters against dpp. *Mol. Biol. Cell* **9**, 2145-2156.
- Jazwinska, A., Kirov, N., Wieschaus, E., Roth, S. and Rushlow, C.** (1999). The *Drosophila* gene brinker reveals a novel mechanism of Dpp target gene regulation. *Cell* **96**, 563-573.
- Jia, J., Zhang, W., Wang, B., Trinko, R. and Jiang, J.** (2003). The *Drosophila* Ste20 family kinase dMST functions as a tumor suppressor by restricting cell proliferation and promoting apoptosis. *Genes Dev.* **17**, 2514-2519.
- Johnston, L. A. and Sanders, A. L.** (2003). Wingless promotes cell survival but constrains growth during *Drosophila* wing development. *Nat. Cell Biol.* **5**, 827-833.
- Kango-Singh, M., Nolo, R., Tao, C., Verstreken, P., Hiesinger, P. R., Bellen, H. J. and Halder, G.** (2002). Shar-pei mediates cell proliferation arrest during imaginal disc growth in *Drosophila*. *Development* **129**, 5719-5730.
- Kim, J., Sebring, A., Esch, J. J., Kraus, M. E., Vorwerk, K., Magee, J. and Carroll, S. B.** (1996). Integration of positional signals and regulation of wing formation and identity by *Drosophila* vestigial gene. *Nature* **382**, 133-138.
- Kirby, B., Bryant, P. and Schneiderman, H.** (1982). Regeneration following duplication in imaginal wing disc fragments of *Drosophila melanogaster*. *Dev. Biol.* **90**, 259-271.
- Lawrence, P. and Morata, G.** (1977). The early development of mesothoracic compartments in *Drosophila*. An analysis of cell lineage and fate mapping and an assessment of methods. *Dev. Biol.* **56** 40-51.
- Lecuit, T., Brook, W. J., Ng, M., Calleja, M., Sun, H. and Cohen, S. M.** (1996). Two distinct mechanisms for long-range patterning by Decapentaplegic in the *Drosophila* wing. *Nature* **381**, 387-393.
- Madhavan, M. M. and Madhavan, K.** (1984). Do larval epidermal cells possess the blueprint for adult pattern in *Drosophila*? *J. Embryol. Exp. Morph.* **82**, 1-8.
- Martín-Blanco, E., Gampel, A., Ring, J., Virdee, K., Kirov, N., Tolkovsky, A. M. and Martinez, A. A.** (1998). puckered encodes a phosphatase that mediates a feedback loop regulating JNK activity during dorsal closure in *Drosophila*. *Genes Dev.* **12**, 557-570.
- Martín-Castellanos, C. and Edgar, B. A.** (2002). A characterization of the effects of Dpp signaling on cell growth and proliferation in the *Drosophila* wing. *Development* **129**, 1003-1013.
- Marty, T., Muller, B., Basler, K. and Affolter, M.** (2000). Schnurri mediates Dpp-dependent repression of brinker transcription. *Nat. Cell Biol.* **2**, 745-749.
- Milan, M., Campuzano, S. and García-Bellido, A.** (1997). Developmental parameters of cell death in the wing disc of *Drosophila*. *Proc. Natl. Acad. Sci. USA* **94**, 5691-5696.
- Minami, M., Kinoshita, N., Kamoshida, Y., Tanimoto, H. and Tabata, T.** (1999). brinker is a target of Dpp in *Drosophila* that negatively regulates Dpp-dependent genes. *Nature* **398**, 242-246.
- Morata, G. and García-Bellido, A.** (1976). Developmental analysis of some mutants of the bithorax system of the *Drosophila*. *Roux's Arch. Dev. Biol.* **179**, 125-143.
- Morata, G. and Ripoll, P.** (1975). Minutes: mutants of *Drosophila* autonomously affecting cell division rate. *Dev. Biol.* **42**, 211-221.
- Moreno, E., Basler, K. and Morata, G.** (2002). Cells compete for decapentaplegic survival factor to prevent apoptosis in *Drosophila* wing development. *Nature* **416**, 755-759.

- Muller, B., Hartmann, B., Pyrowolakis, G., Affolter, M. and Basler, K.** (2003). Conversion of an extracellular Dpp/BMP morphogen gradient into an inverse transcriptional gradient. *Cell* **113**, 221-233.
- Nellen, D., Burke, R., Struhl, G. and Basler, K.** (1996). Direct and long-range action of a DPP morphogen gradient. *Cell* **85**, 357-368.
- Pantalacci, S., Tapon, N. and Leopold, P.** (2003). The Salvador partner Hippo promotes apoptosis and cell-cycle exit in *Drosophila*. *Nat. Cell Biol.* **5**, 921-927.
- Podos, S. D. and Ferguson, E. L.** (1999). Morphogen gradients: new insights from DPP. *Trends Genet.* **15**, 396-402.
- Raftery, L. A. and Sutherland, D. J.** (1999). TGF-beta family signal transduction in *Drosophila* development: from Mad to Smads. *Dev. Biol.* **210**, 251-268.
- Rushlow, C., Colosimo, P. F., Lin, M. C., Xu, M. and Kirov, N.** (2001). Transcriptional regulation of the *Drosophila* gene *zen* by competing Smad and Brinker inputs. *Genes Dev.* **15**, 340-351.
- Ruvkun, G.** (2001). Molecular biology. Glimpses of a tiny RNA world. *Science* **294**, 797-799.
- Saller, E., Kelley, A. and Bienz, M.** (2002). The transcriptional repressor Brinker antagonizes Wingless signaling. *Genes Dev.* **16**, 1828-1838.
- Sivasankaran, R., Vigano, M. A., Muller, B., Affolter, M. and Basler, K.** (2000). Direct transcriptional control of the Dpp target *omb* by the DNA binding protein Brinker. *EMBO J.* **19**, 6162-6172.
- Sosinsky, A., Bonin, C. P., Mann, R. S. and Honig, B.** (2003). Target Explorer: an automated tool for the identification of new target genes for a specified set of transcription factors. *Nucleic Acids Res.* **31**, 3589-3592.
- Stocker, H. and Hafen, E.** (2000). Genetic control of cell size. *Curr. Opin. Genet. Dev.* **10**, 529-535.
- Strigini, M. and Cohen, S. M.** (1999). Formation of morphogen gradients in the *Drosophila* wing. *Semin. Cell Dev. Biol.* **10**, 335-344.
- Sturtevant, M. A., Bihs, B., Marin, E. and Bier, E.** (1997). The spalt gene links the A/P compartment boundary to a linear structure in the *Drosophila* wing. *Development* **124**, 21-32.
- Su, T. T., Sprenger, F., DiGregorio, P. J., Campbell, S. D. and O'Farrell, P. H.** (1998). Exit from mitosis in *Drosophila* syncytial embryos requires proteolysis and cyclin degradation, and is associated with localized dephosphorylation. *Genes Dev.* **12**, 1495-1503.
- Tabata, T.** (2001). Genetics of morphogen gradients. *Nat. Rev. Genet.* **2**, 620-630.
- Tapon, N., Harvey, K. F., Bell, D. W., Wahrer, D. C., Schiripo, T. A., Haber, D. A. and Hariharan, I. K.** (2002). Salvador Promotes both cell cycle exit and apoptosis in *Drosophila* and is mutated in human cancer cell lines. *Cell* **110**, 467-478.
- Teleman, A. and Cohen, S.** (2000). Dpp gradient formation in the *Drosophila* wing imaginal disc. *Cell* **103**, 971-980.
- Tsuneizumi, K., Nakayama, T., Kamoshida, Y., Kornberg, T., Christian, J. and Tabata, T.** (1997). Daughters against dpp modulates dpp organizing activity in *Drosophila* wing development. *Nature* **389**, 627-631.
- Udan, R. S., Kango-Singh, M., Nolo, R., Tao, C. and Halder, G.** (2003). Hippo promotes proliferation arrest and apoptosis in the Salvador/Warts pathway. *Nat. Cell Biol.* **5**, 914-920.
- Wang, S. L., Hawkins, C. J., Yoo, S. J., Muller, H. A. and Hay, B. A.** (1999). The *Drosophila* caspase inhibitor DIAP1 is essential for cell survival and is negatively regulated by HID. *Cell* **98**, 453-463.
- Wolff, T. and Ready, D. F.** (1991). Cell death in normal and rough eye mutants of *Drosophila*. *Development* **113**, 825-839.
- Wu, S., Huang, J., Dong, J. and Pan, D.** (2003). *hippo* encodes a Ste-20 family protein kinase that restricts cell proliferation and promotes apoptosis in conjunction with Salvador and Warts. *Cell* **114**, 445-456.
- Zecca, M., Basler, K. and Struhl, G.** (1995). Sequential organizing activities of engrailed, Hedgehog and decapentaplegic in the *Drosophila* wing. *Development* **121**, 2565-2578.
